# Supplementary material for: Variation in price of cardiovascular and diabetes medicine in Indonesia, and relationship with quality: a mixed methods study in East Java
Source: bioRxiv or medRxiv preprint supplement (doi:10.1101/2022.11.24.22282722), 2022-11-27
Supplement: Supplementary file [file media-1.pdf]

**Supplementary Table 1: Profile of In-depth Interview contributors**

| <b>Contributor</b>                            | <b>Sector</b> | <b>Number of individuals interviewed</b> |
|-----------------------------------------------|---------------|------------------------------------------|
| District Warehouse                            | Public        | 2                                        |
| Primary health centre<br>( <i>Puskesmas</i> ) | Public        | 4                                        |
| Community health<br>outpost                   | Public        | 2                                        |
| District hospital                             | Public        | 1                                        |
| Local medicine<br>distributor                 | Private       | 1                                        |
| Independent pharmacy                          | Private       | 3                                        |
| National chain pharmacy                       | Private       | 2                                        |
