# Supplementary material for: Variation in price of cardiovascular and diabetes medicine in Indonesia, and relationship with quality: a mixed methods study in East Java
Source: bioRxiv or medRxiv preprint supplement (doi:10.1101/2022.11.24.22282722), 2022-11-27
Supplement: Supplementary file [file media-2.pdf]

**Supplementary Table 2: Details of medicine prices, by medicine and dosage**

|                  | Prices in Indonesian Rupiah |            |        |            |         | Prices in US\$ |            |        |            |         | # samples |
|------------------|-----------------------------|------------|--------|------------|---------|----------------|------------|--------|------------|---------|-----------|
|                  | Lowest                      | 25th       | Median | 75th       | Highest | Lowest         | 25th       | Median | 75th       | Highest |           |
|                  |                             | percentile |        | percentile |         |                | percentile |        | percentile |         |           |
| Branded          |                             |            |        |            |         |                |            |        |            |         |           |
| Amlodipine 5mg   | 450                         | 500        | 1000   | 1500       | 8145    | 0.0313         | 0.0348     | 0.0696 | 0.1044     | 0.5668  | 19        |
| Amlodipine 10mg  | 500                         | 1000       | 1664   | 12000      | 12650   | 0.0348         | 0.0696     | 0.1158 | 0.8351     | 0.8803  | 16        |
| Captopril 15mg   | 250                         | 375        | 425    | 632        | 1500    | 0.0174         | 0.0261     | 0.0296 | 0.0439     | 0.1044  | 8         |
| Glibenclamide 5m | 190                         | 250        | 300    | 1500       | 5400    | 0.0132         | 0.0174     | 0.0209 | 0.1044     | 0.3758  | 9         |
| Furosemide 40mg  | 250                         | 300        | 375    | 1300       | 6369    | 0.0174         | 0.0209     | 0.0261 | 0.0905     | 0.4432  | 11        |
| Simvastatin 10mg | 300                         | 575        | 750    | 1513       | 5800    | 0.0209         | 0.0400     | 0.0522 | 0.1053     | 0.4036  | 14        |
| Simvastatin 20mg | 600                         | 600        | 800    | 1833       | 4000    | 0.0418         | 0.0418     | 0.0557 | 0.1276     | 0.2784  | 5         |
| Unbranded        |                             |            |        |            |         |                |            |        |            |         |           |
| Amlodipine 5mg   | 61                          | 400        | 500    | 550        | 1667    | 0.0042         | 0.0278     | 0.0348 | 0.0383     | 0.1160  | 29        |
| Amlodipine 10mg  | 109                         | 500        | 600    | 750        | 1300    | 0.0076         | 0.0348     | 0.0418 | 0.0522     | 0.0905  | 21        |
| Captopril 12.5mg | 73                          | 200        | 200    | 200        | 250     | 0.0051         | 0.0139     | 0.0139 | 0.0139     | 0.0174  | 5         |
| Captopril 15mg   | 129                         | 200        | 200    | 300        | 500     | 0.0090         | 0.0139     | 0.0139 | 0.0209     | 0.0348  | 7         |
| Glibenclamide 5m | 131                         | 200        | 300    | 500        | 500     | 0.0091         | 0.0139     | 0.0209 | 0.0348     | 0.0348  | 11        |
| Furosemide 40mg  | 90                          | 250        | 300    | 400        | 700     | 0.0063         | 0.0174     | 0.0209 | 0.0278     | 0.0487  | 9         |
| Simvastatin 10mg | 129                         | 400        | 500    | 600        | 1000    | 0.0089         | 0.0278     | 0.0348 | 0.0418     | 0.0696  | 14        |
| Simvastatin 20mg | 239                         | 800        | 1000   | 1003       | 1500    | 0.0166         | 0.0557     | 0.0696 | 0.0698     | 0.1044  | 17        |
